1           **Timing and original features of flagellum assembly in trypanosomes during**  
2 **development in the tsetse fly**

3

4

5

6 Moara Lemos<sup>1</sup>, Adeline Mallet<sup>1,2,3</sup>, Eloïse Bertiaux<sup>4</sup>, Albane Imbert<sup>5</sup>, Brice Rotureau<sup>1</sup>, Philippe

7 Bastin<sup>1,6</sup>

8

9 <sup>1</sup>Trypanosome Cell Biology Unit, Institut Pasteur & INSERM U1201, 25, rue du Docteur

10 Roux, 75015 Paris, France.

11 <sup>2</sup>UtechS Ultrastructural Bioimaging (Ultrapole), C2RT, Institut Pasteur

12 <sup>3</sup>Sorbonne université école doctorale complexité du vivant, ED 515, 7, quai Saint-Bernard,

13 case 32, 75252 Paris Cedex 05, France.

14 <sup>4</sup>Department of Cell Biology, University of Geneva

15 <sup>5</sup>Fab Lab, Institut Pasteur

16 <sup>6</sup>Correspondent author

17

18

19 **Abstract**

20

21 *Trypanosoma brucei* exhibits a complex life cycle alternating between tsetse flies  
22 and mammalian hosts. When parasites infect the fly, cells differentiate to adapt to life in  
23 various tissues, which is accompanied by drastic morphological and biochemical  
24 modifications especially in the proventriculus. This key step represents a bottleneck  
25 for salivary gland infection. Here we monitored flagellum assembly in trypanosomes  
26 during differentiation from the trypomastigote to the epimastigote stage, i.e. when the  
27 nucleus migrates to the posterior end of the cell. Three-dimensional electron microscopy  
28 (Focused Ion Beam Scanning Electron Microscopy, FIB-SEM) and immunofluorescence  
29 assays provided structural and molecular evidence that the new flagellum is assembled  
30 while the nucleus migrates towards the posterior region of the body. Two major  
31 differences with well known procyclic cells are reported. First, growth of the new  
32 flagellum begins when the associated basal body is found in a posterior position relative to  
33 the mature one. Second, the new flagellum acquires its own flagellar pocket before rotating  
34 on the left side of the anterior-posterior axis. FIB-SEM revealed the presence of a structure  
35 connecting the new and mature flagellum and serial sectioning confirmed morphological  
36 similarities with the flagella connector of procyclic cells. We discuss potential function of  
37 the flagella connector in trypanosomes from the proventriculus. These findings show that  
38 *T. brucei* finely modulates its cytoskeletal components to generate highly variable  
39 morphologies.

40 **Author Summary**

41 *Trypanosoma brucei* is a flagellated parasitic protist that causes human African  
42 trypanosomiasis, or sleeping sickness and that is transmitted by the bite of tsetse flies. The  
43 complex life cycle of *T. brucei* inside the tsetse digestive tract requires adaptation to

44 specific organs and follow a strictly defined order. It is marked by morphological  
45 modifications in cell shape and size, as well organelle positioning. In the proventriculus of  
46 tsetse flies, *T. brucei* undergoes a unique asymmetric division leading to two very different  
47 daughter cells: one with a short and one with a long flagellum. This organelle is crucial for  
48 the trypanosome life cycle as it is involved in motility, adhesion and morphogenesis. Here  
49 we investigated flagellum assembly using molecular and 3D Electron Microscopy  
50 approaches revealing that flagellum construction in proventricular trypanosomes is  
51 concomitant with parasite differentiation. During flagellum growth, the new flagellum is  
52 connected to the mature one and rotates around the mature one after its emergence at the  
53 cell surface. The sequence of events is different from what is observed in the well-studied  
54 procyclic stage in culture revealing different processes governing morphological  
55 development. These results highlight the importance to study pathogen development in  
56 their natural environment.

57

58

## 59 **Introduction**

60 *Trypanosoma brucei* is a flagellated parasite responsible for African  
61 trypanosomiasis that affects humans and cattle. This parasite is transmitted by the bite of a  
62 tsetse fly that itself was infected by ingesting trypanosomes during a blood meal on an  
63 infected mammalian host. *T. brucei* exhibits a complex life cycle in which a series of  
64 duplication and differentiation processes follow a very ordered progression along the  
65 digestive tract of tsetse flies (1–6). When the fly is feeding on an infected mammal,  
66 bloodstream trypanosomes are ingested and differentiate into the procyclic form that  
67 colonize the posterior midgut (1). Then, procyclic cells migrate from the posterior midgut  
68 to the proventriculus (PV, also known as cardia) where they undergo several modifications  
69 before reaching the salivary glands. This is a critical step in parasite development and  
70 actually represents the major bottleneck for a successful life cycle (7). The only human-  
71 infective parasites are called metacyclic trypanosomes and are produced in the salivary  
72 glands to be released in the saliva (3–5,8). The successive trypanosome adaptations to  
73 these different environments include at least metabolic switching, expression of various  
74 stage-specific surface molecules and dramatic changes in morphology (1,3,5,9–11).

75 The basic cell organization of *T. brucei* is characterized by the presence of a  
76 flagellum that is attached to the cell body, a nucleus, a single large and ramified  
77 mitochondrion whose genome is concentrated in a structure named kinetoplast (9), which  
78 is associated to the basal body of the flagellum through the tripartite attachment complex  
79 (12,13). Along their life cycle, trypanosomes exhibit different morphologies classified  
80 according to the relative position of the nucleus and the kinetoplast along the antero-  
81 posterior axis of the cell. The posterior position of the kinetoplast in relation to the nucleus  
82 defines the trypomastigote morphology, whereas the anterior position defines the  
83 epimastigote morphology (14).

84           The flagellum is a cylindrical microtubule-based structure composed of the basal  
85 body made of 9 microtubule triplets followed by the transition zone (TZ) (9 microtubule  
86 doublets) and the axoneme that displays a classical 9+2 structure with nine microtubule  
87 doublets and two central singlets. An extra axonemal structure named the paraflagellar rod  
88 (PFR) is connected to doublets 4-7 of the axoneme after flagellum emergence from the  
89 flagellar pocket (9). The trypanosome cell shape is defined by a corset of subpellicular  
90 microtubules found underneath the plasma membrane with the exception of a single region  
91 of the body, the flagellar pocket from where the flagellum emerges (9,15,16). The flagellar  
92 pocket is an invagination of the plasma membrane forming a bulb-like structure. When  
93 trypanosomes enter the cell cycle, one of the morphological hallmarks is the assembly of a  
94 new flagellum (15). In procyclic cells, flagellum construction is characterized by the  
95 maturation of an existing pro-basal body followed by the elongation of a new TZ and  
96 axoneme. The new flagellum is assembled in an anterior position relative to the old one. It  
97 invades the existing flagellar pocket and its basal body rotates around the mature one  
98 ensuring the division of the flagellar pocket (17). The tip of the new flagellum is physically  
99 connected to the side of the mature flagellum via a cytoskeletal structure termed flagella  
100 connector, a transmembrane junction only present during the formation of the new  
101 flagellum (18–21). The connection ensures that the new flagellum follows the same helical  
102 path as the mature one and the transmission of cell polarity (18). The flagellum is involved  
103 in multiple important functions of the parasite during the tsetse infection cycle, such as  
104 migration from the midgut to the foregut, and adhesion to the salivary gland epithelium  
105 (1,5,8,22,23). Moreover, it plays a crucial role in cell morphogenesis (24,25). Finally, it  
106 could act as potential environmental sensor (5,26,27).

107           The effective success of *T. brucei* transmission to a new vertebrate host relies  
108 solely on the metacyclic form, the last developmental stage in the vector that is released

109 together with the insect saliva during the blood meal (5,8). To produce metacyclic  
110 trypanosomes, parasites need to colonize the salivary glands. This is presumably ensured  
111 by the short epimastigote form that is issued from an asymmetric division taking place in  
112 the PV (3,10,28). The PV is an organ that separates the midgut from the foregut and  
113 produces the peritrophic matrix, a structure composed of chitin and glycoproteins acting as  
114 a physical and biochemical barrier that protects the epithelium from the potentially toxic  
115 effects of bloodmeal and pathogens (29,30).

116         Drastic morphological modifications are taking place in the PV. Parasites first  
117 exhibit the trypomastigote morphology and the nucleus changes from an oval to an  
118 elongated shape, the body length increases and the distance between the nucleus and the  
119 kinetoplast decreases until the nucleus occupies a more posterior position assuming an  
120 epimastigote morphology (10). The epimastigote form enters in a single duplication cycle  
121 where a mother cell gives rise to two different daughter cells: a short and a long  
122 epimastigote (3,10). In this asymmetric division the long epimastigote inherits the long  
123 mature flagellum while the short epimastigote possesses the newly assembled, but much  
124 shorter flagellum, around 10-fold (4,10). The ultrastructural characterization of the  
125 asymmetrically dividing trypanosomes by scanning electron microscopy (SEM) suggests  
126 that a short new flagellum emerges from the same flagellar pocket as the mature one. The  
127 flagella are linked via a flagella connector-like structure as demonstrated by a single image  
128 of transmission electron microscopy (TEM) (10). However, these approaches faced some  
129 limitations: SEM shows the cell topography but the kinetoplast and the nucleus are not  
130 visible hence preventing morphotype identification. Furthermore, the new flagellum is  
131 detected only when it is visible outside of the flagellar pocket. In the case of TEM, single  
132 thin sections rarely show the relative position of the nucleus and the kinetoplast, as well as  
133 the presence of the mature and new flagellum. To circumvent these issues, we revisited

134 *T. brucei* differentiation in the PV using immunofluorescence assays to monitor flagellum  
135 markers, TEM serial sectioning and a 3D electron microscopy approach called Focused  
136 Ion Beam Scanning Electron Microscopy (FIB-SEM) based on the use of the slice-and-  
137 view method to have a more global vision of flagellum assembly. Here we show that the  
138 assembly of the new flagellum is initiated earlier than previously reported in PV  
139 trypanosomes committed to the asymmetric division. Formation of a transition zone and  
140 elongation of the flagellum can already be detected in trypomastigote cells. In contrast to  
141 procyclic trypanosomes, flagellum construction is characterized by an early basal body  
142 segregation and the rapid acquisition of an independent flagellar pocket, followed by a late  
143 flagellum rotation when compared with procyclic cells. The flagella connector structure  
144 that links the new flagellum to the mature one is present from the early stages of flagellum  
145 construction.

146

## 147 **Material and Methods**

### 148 ***Trypanosoma brucei* strain and tsetse infection**

149 The AnTat 1.1E is a pleomorphic clone of *T. brucei* originated from a bushbuck in  
150 Uganda in 1966 (31). Procyclic trypanosomes expressing a cytoplasmic reporter composed  
151 of the red-shifted luciferase (PpyRE9H) fused to the TdTomato red fluorescent protein and  
152 a Ty1 tag (PpyRE9H/TY1/TdTomato) (32) were grown at 27° C in SDM-79 medium (33)  
153 supplemented with 10% (v/v) heat-inactivated foetal calf serum (FCS) and 8 mM glycerol.  
154 *Glossina morsitans morsitans* teneral males were fed with medium SDMG enriched with  
155 10 mM glutathione containing  $5 \times 10^6$  trypanosomes/ml. Flies were starved for at least 24  
156 h before dissection performed at 14 or 21 days after infection. Tsetse were scrutinized  
157 under a M165FC stereo microscope (Leica) for fluorescent parasites emitted by the  
158 TdTomato protein that is visible through the tsetse fly cuticle (32). A total of 33 flies were

159 dissected and the whole alimentary tract removed and placed on a glass slide containing a  
160 drop of PBS for immunofluorescence or in cold cacodylate buffer for Electron Microscopy  
161 (EM) experiments.

### 162 **Immunofluorescence assay**

163 Proventriculi of 12 infected flies were placed in a single 100  $\mu$ l drop of PBS (pH  
164 7.6) on poly-L-lysine coated slides (J2800AMMZ; Thermo Fisher Scientific). The PVs  
165 were dilacerated using two 26 gauge needles to release trypanosomes. Cells were left for 5  
166 min to settle before fixation in cold methanol for 10 sec followed by a rehydration step in  
167 PBS for 15 min. For immunodetection, slides were incubated for 1 hour at 37° C in 0.1%  
168 BSA in PBS with anti-FTZC 1:500 (rabbit polyclonal), which recognizes a protein termed  
169 flagellum transition zone component localized in the transition zone (34) and with mAb25  
170 1:10 (IgG2a) a mouse monoclonal antibody, which recognizes the axonemal protein  
171 TbSAXO1 (35,36). After three 5-min washes in PBS, slides were incubated for 1 h at 37°  
172 C with anti-mouse antibodies coupled to Cy5 (Jackson) and with anti-rabbit antibodies  
173 coupled to Alexafluor-488 (Invitrogen) diluted 1:500 in PBS. Slides were washed three  
174 times for 5 min in PBS and DNA was labeled with DAPI (10  $\mu$ g.mL<sup>-1</sup>). Slides were  
175 mounted in ProLong antifade (Invitrogen) and analyzed with a DMI4000 microscope  
176 (Leica), objective 100x 1.4 NA and images were acquired with an ORCA-03G camera  
177 (Hamamatsu). Image acquisition was performed using Micromanager software.

### 178 **Electron microscopy**

179 For EM sample preparation, the entire digestive tracts of 11 flies were placed in a  
180 drop of 0.1 M cacodylate buffer (pH 7.2) and fixed in 2.5% glutaraldehyde (Sigma-  
181 Aldrich), 4% paraformaldehyde. Entire proventriculi were then separated from the  
182 digestive tract and transferred to 1.5 ml Eppendorf tubes containing 500  $\mu$ l of 2.5%  
183 glutaraldehyde, 4% paraformaldehyde in 0.1 M cacodylate buffer (pH 7.2) for 1 or 2 h at



184 4° C. Fixed samples were washed three times by the addition of fresh 0.1 M cacodylate  
185 buffer (pH 7.2) buffer and post-fixed in 1% osmium (EMS) in 0.1 M cacodylate buffer (pH  
186 7.2) enriched with 1.5% potassium ferrocyanide (Sigma-Aldrich) for 50 min in the dark  
187 under agitation. Samples were gradually dehydrated in acetone (Sigma-Aldrich) series  
188 from 50% to 100%. Proventriculi were oriented along longitudinal or transversal axes and  
189 embedded in PolyBed812 resin (EMS) hard protocol (37), followed by polymerization for  
190 48 h at 60° C. For TEM analysis, 80 nm-thick serial sections were post-stained with 10%  
191 uranyl acetate followed by 3% lead citrate, and observed in a FEI Tecnai T12 120kV. For  
192 FIB-SEM analysis, the resin embedded PVs were mounted on aluminum stubs, with the  
193 pyramidal surface of the resin block pointing upwards. The block surface was coated with  
194 a 20 nm-thick layer gold-palladium in a Gatan Ion Beam Coater 681 sputtering device and  
195 in additional 2 nm platinum layer using the gas injection system placed inside the Field  
196 Emission Scanning Electron Microscope (FESEM) Crossbeam Auriga (Carl Zeiss)  
197 workstation microscope chamber. The specimen stage was tilted at 54° with 5 mm working  
198 distance of the pole piece, at the coincidence point of the electron and the galion beams.  
199 The milling conditions for the trench that allowed the view of the cross-section were 10 nA  
200 at accelerating voltage of 30kV. The fine polishing of the surface block was performed  
201 with 5 nA at 30kV. For the slice series, 1 nA milling current was applied removing a 10  
202 nm layer from the specimen block surface. Scanning EM images were recorded with an  
203 aperture of 60 µm in the high-current mode at 1.5kV of the in-lens EsB detector with the  
204 EsB grid set to -300 to -500V. The voxel size was 10 nm in x, y, and z. The contrast of  
205 back-scattered electron images was inverted and acquired using ATLAS 5 software (Carl  
206 Zeiss).

## 207 **Data processing, 3D reconstruction and Flagellum measurement**

208           Alignment of stacks was done with the open source software ImageJ (National  
209   Institutes of Health (38) and the Amira software was used for visualization (v6.0.1; FEI;  
210   Thermo Fisher Scientific). Segmentation and 3D reconstructions were performed manually  
211   using Amira software and a color code was attributed as follows: the new flagellum in  
212   orange, the mature one in red, the kinetoplast in purple and the nucleus in blue. The new  
213   flagellum of trypanosomes was measured by segmenting the first slice of the basal plate up  
214   to the tip of the flagellum including the flagellar membrane.  
215  
216  
217

218 **Results**

219 **Flagellum construction is initiated in trypomastigote parasites from the**  
220 **proventriculus**

221 Infected tsetse flies were dissected and trypanosomes found in the proventriculus  
222 were inspected by using different approaches such as immunofluorescence assays (IFA),  
223 classical Transmission Electron Microscopy (TEM) and 3D FIB-SEM. As IFA markers,  
224 we used an antibody against the flagellum transition zone component FTZC (34) and the  
225 monoclonal antibody mAb25 to detect an axoneme microtubule associated protein called  
226 TbSAXO1 (35,36) (Fig 1). In the PV, cell types were defined by their nucleus/kinetoplast  
227 DNA content (10) and subcategories were discriminated according to the nucleus  
228 morphology in oval (Fig 1A and B) and elongated (Fig 1C and D) as visualized by DAPI  
229 staining. Figs 1A shows a trypanosome containing an oval nucleus and a single flagellum  
230 with one TZ (magenta) and one axoneme (green). However, 24% (n = 16) of  
231 trypomastigotes with an oval nucleus possessed a second spot for FTZC (Fig 1B) which is  
232 lateral and in close proximity to the mature one (Fig 1B). A trypomastigote containing an  
233 elongated nucleus and a flagellum with one TZ and one axoneme is shown in Fig 1C. A  
234 second fluorescent signal for FTZC was also observed in trypomastigotes with elongated  
235 nucleus (Fig 1D). Cells containing a second fluorescent signal for FTZC represented 54%  
236 of this population (n = 60) (Fig 1D). In 21% of these trypanosomes, a tiny mAb25 signal  
237 was observed following the FTZC signal (Fig 1D). The increase in distance between the  
238 two signals for FTZC and a more posterior position of the new flagellum in relation to the  
239 mature one is presumably due to migration of the basal body of the new flagellum (Fig  
240 1D). The length of the mAb25 signal increased in trypanosomes where the nucleus was  
241 migrating towards the posterior end during the differentiation process from trypomastigote  
242 to epimastigote (Fig 1E). When the nucleus was positioned at the level of the kinetoplast,

243 cells could no longer be defined as trypomastigote or epimastigote, hence they have been  
244 termed “transition forms”. In 100% of transition forms cells a second signal for the TZ  
245 and for mAb25 were observed. Cells with positive signal for both FTZC and mAb25 signal  
246 in different morphotypes have been quantified (Suppl. Fig 1).

247         These results suggest that a new TZ and a new axoneme are already assembled at  
248 the trypomastigote stage in parasites found in the PV. Nevertheless, the signal intensity  
249 presumably associated to the new flagellum turned out to be weaker compared with the  
250 mature flagellum (Fig. 1D/E). Although IFA demonstrates the presence of FTZC and  
251 TbSAXO1 proteins, it does not formally prove that the structures are fully assembled.  
252 Considering the differences in intensity of the fluorescent signals, it was crucial to verify  
253 the ultrastructural organization by electron microscopy techniques.

254

### 255 **The 3D organization of flagellum assembly in trypomastigotes and transition forms** 256 **from the proventriculus**

257         FIB-SEM combines an ion beam and an electron for achieving a slice-and-view  
258 technique. The ion beam promotes micro abrasions on the sample surface exposing a fresh  
259 new layer and the electron beam scans over the block surface generating the image. This  
260 process is repeated for several micrometers and the collected images generate 3D stacks  
261 with a 10 nm resolution in Z-axis. Two stacks of 15.2  $\mu\text{m}$  and 9.7  $\mu\text{m}$  from the same block  
262 were analyzed and representative cells were chosen for segmentation and 3D  
263 reconstruction.

264         Entire PVs were immediately fixed after dissection maintaining the location of  
265 trypanosomes in their microenvironment and avoiding any contamination with parasites  
266 from the midgut and foregut. The processed PVs were oriented along longitudinal or  
267 transversal axes during embedding for better accessibility to the lumen where higher

268 concentrations of trypanosomes were found. The assembly of the new flagellum was  
269 investigated in these cells. The earliest stage of flagellum duplication was observed in  
270 trypomastigotes with an elongated nucleus (Fig. 2 and video 1). Figure 2A shows the  
271 ultrastructural organization of a trypomastigote cell containing a short new flagellum  
272 closely associated to the mature one. New and mature flagella were segmented including  
273 the flagellar membrane. This parasite was selected for 3D reconstruction (Fig. 2B, C and  
274 D). The new flagellum (orange) is closely located to the kinetoplast (purple) (Fig. 2A and  
275 B), and is composed of a TZ, a 9+0 microtubule doublet structure in continuity with the  
276 basal body (Fig. 2 C, white arrowhead), and a short axoneme of 968 nm in length (from the  
277 basal plate of the TZ to the tip), which is entirely enclosed by the flagellar pocket (Fig. 2A  
278 and B). The basal bodies are close to each other and separated by only 440 nm. The bottom  
279 view of the cell allows the visualization of the entire elongated nucleus (blue) that is 6.8  
280  $\mu\text{m}$  long and occupies a large portion of the cell body (Fig. 2C). The most posterior end of  
281 the nucleus is separated from the kinetoplast center by 1.8  $\mu\text{m}$ . Figure 2D shows the top  
282 surface view of the cell body and confirms that only the mature flagellum (red) emerges  
283 from the flagellar pocket (Fig. 2D).

284 Figure 3A shows a section of a trypomastigote cell with the basal body (Fig. 3 C,  
285 white arrowhead) of the new flagellum, which is found in a posterior position relative to  
286 the mature one (Fig. 3 C, black arrowhead). The basal bodies are separated by 700 nm. The  
287 axoneme reaches 1.2  $\mu\text{m}$  and emerges from the flagellar pocket in a posterior position  
288 relative to the mature flagellum (Fig. 3B and D). The nucleus is closer to the kinetoplast, as  
289 they are separated by only 819 nm (Fig. 3C and video 2).

290 For transition forms, parasites were subdivided into early transition form (Fig. 4A-  
291 D) and late transition form according to the relative nucleus-kinetoplast position (Fig. 4E-  
292 G). In an early transition form, the kinetoplast is enlarged (Fig. 4A) possibly reflecting the

293 duplication of the mitochondrial genome (10). The basal body of the new flagellum is  
294 located close to the posterior tip of the kinetoplast (Fig. 4B) and the axoneme measures 2.8  
295  $\mu\text{m}$ . The nucleus and the kinetoplast are occupying the same plane reflecting the moment  
296 when the nucleus reaches the posterior tip of the kinetoplast (Fig. 4B and C). This is  
297 accompanied by an obvious nucleus deformation (Fig. 4C). Fig. 4D shows the top view of  
298 the cell with the new flagellum positioned to the left side relative to the antero-posterior  
299 axis of the cell body. A trypanosome in a late transition form is showed in Fig. 4 E-G. The  
300 slice view shows the kinetoplast, the nucleus, the new flagellum and the mature flagellum  
301 (Fig. 4E). The nucleus migrates towards the posterior region and the kinetoplast is  
302 positioned at the anterior half of the nucleus region (Fig. 4 E and F). The basal body of the  
303 new flagellum (Fig 4 F, white arrowhead) is positioned at the posterior tip of the  
304 kinetoplast, in a similar position as observed in the early transition form (Fig. 4 A-D).  
305 However, the new flagellum is laterally positioned to the right side of the antero-posterior  
306 axis of the cell body. This is in contrast with all previous stages where the new flagellum is  
307 positioned on the left side when looked from the anterior to posterior region of the cell  
308 body. The basal bodies are separated by 2.3  $\mu\text{m}$  and the length of the axoneme of the new  
309 flagellum reaches 3.7  $\mu\text{m}$  (Fig. 4F and G).

310         Flagellum elongation in proventricular trypanosomes was measured in cells  
311 corresponding to the stages described above (Fig. 5) by taking the first slice of the basal  
312 plate up to the tip of the flagellum including the flagellar membrane. The new flagellum  
313 elongates progressively, consistent with the order suggested by IFA experiments. When the  
314 new flagellum is inside the flagellar pocket, it measures in average 817 nm ( $n = 10$ ). When  
315 this flagellum grows further and can be detected outside of the flagellar pocket in  
316 trypomastigote cells, its whole length is 1.5  $\mu\text{m}$  ( $n = 12$ ), a value that culminates at  
317 2.9  $\mu\text{m}$  ( $n = 7$ ) in transition forms.

318 We analyzed 79 trypanosomes during the formation of the new flagellum by using  
319 FIB-SEM. The tip of the new flagellum was not visible in 8 cells, but in the 71 other ones  
320 an electron-dense structure was observed between the tip of the new flagellum and the side  
321 of the mature flagellum. This electron-dense structure seems to connect the new flagellum  
322 and the mature one, similar to the flagella connector observed in procyclics (18,19,21).  
323 However, the resolution provided by FIB-SEM is not sufficient to analyze its ultrastructure  
324 in details. Therefore, we turned to TEM analysis of serial sections, an approach that  
325 provides more resolution for structural investigations.

326  
327 **The new and the mature flagella are associated via a flagella connector structure**

328 Three 80 nm-thick serial sections of a trypomastigote cell with two flagella are  
329 shown at Fig. 6. In this cell, a tiny new flagellum is located inside the flagellar pocket,  
330 which is shared with the mature flagellum (Fig. 6A-D). This is the earliest stage of  
331 flagellum duplication in a trypomastigote cell that could be observed by TEM. The new  
332 flagellum consists of a TZ, a basal plate, and a short axoneme (Fig. 6E). A structure  
333 linking the new flagellum and the mature one is present and exhibits an electron-dense  
334 trilaminar morphology connecting laterally the distal region of the new flagellum with the  
335 mature one (Fig. 6C and D – bordeaux arrowheads). Starting from the base of the new  
336 axoneme, a first electron-dense plate is facing the basal plate of the new flagellum and the  
337 TZ region of the mature one (Fig. 6C – E). The second plate is facing the axoneme of the  
338 new flagellum and a portion of the basal plate of the mature one. Finally, the last electron-  
339 dense plate is found between the two axonemes.

340

341 **Discussion**

342 Trypanosome duplication is well documented in procyclic and bloodstream forms.  
343 Differentiation from one stage to the other has been well investigated for bloodstream to  
344 procyclic conversion (39–41). By contrast, trypanosome development in the tsetse PV is  
345 still poorly understood (28). This is explained by the lack of *in vitro* culture for parasites  
346 from PV and therefore requires the dissection of a large number of flies which is time-  
347 consuming and demands experienced staff.

348 In this paper, we revisited the process leading to the asymmetric division and the  
349 production of long and short epimastigotes in the tsetse proventriculus (Fig. 7). It was  
350 thought that the order of the events was first the differentiation of trypomastigotes into  
351 epimastigotes that was previously inferred to follow a series of cellular modifications  
352 according to a precise chronological plan: (1) nucleus migration to the posterior region of  
353 the body, followed by (2) new flagellum assembly, (3) duplication of the kinetoplast and  
354 (4) mitosis, ending with (5) cytokinesis to produce one long and one short epimastigote  
355 cells (3,10,28). Here, we show that the assembly of the new flagellum is rather initiated  
356 before nucleus migration in trypomastigotes (Fig. 7 step 1). The presence of a short new  
357 flagellum was unambiguously demonstrated by using specific molecular markers of the TZ  
358 (FTZC) and of the axoneme (TbSAXO1) (34–36) combined with 3D FIB-SEM data and  
359 TEM serial sections showing the structure of the basal body, the TZ and the axoneme of  
360 the new flagellum. First, the short new flagellum is assembled and invades the existing  
361 flagellar pocket (Fig. 7 steps 1). This is supported by molecular evidence with a second  
362 FTZC signal which is localized in the TZ in trypomastigote parasites with an oval nucleus.  
363 Detection of TbSAXO1 indicates that the new flagellum is in a more advanced stage of  
364 assembly and correlates with a morphological change in the nucleus from oval to  
365 elongated. Such cells types could not have been detected in previous studies because



366 flagellum specific markers were not included (3,10). By DAPI staining and by EM  
367 approaches, only one kinetoplast could be observed (10), hence leading to an  
368 underestimation of the number of cells that already have initiated assembly of a short new  
369 flagellum. Consistent with molecular data, integrated analyses of FIB-SEM results and  
370 TEM serial sections provided support for the following series of events (Fig. 7 steps 2 - 5):  
371 the new flagellum grows connected to the mature flagellum, the basal bodies segregate and  
372 the new flagellum rotates in relation to the mature one. These events take place while the  
373 nucleus migrates towards the posterior region of the body (Fig. 7 steps 2 - 5). Although the  
374 construction of a new flagellum could be detected by routine EM techniques, evidence for  
375 new flagellum assembly can only be obtained if the new flagellum emerges from the  
376 flagellar pocket in the case of SEM or when a second flagellum is detected in the same  
377 section as the mature one in the case of TEM.

378         The early stages of flagellum construction in PV parasites exhibit differences in the  
379 sequence of events when compared to procyclic trypanosomes (17,42). The assembly of  
380 the new flagellum in procyclic trypanosomes is initiated in an anterior position relatively to  
381 the mature flagellum. The pro-basal body matures into a basal body from which the TZ is  
382 assembled. The nascent TZ is adjacent to the mature flagellum and the axoneme elongates  
383 while it is still connected to the mature flagellum through the flagella connector  
384 (17,19,21,34). The new flagellum undergoes an anticlockwise rotation around the mature  
385 one while the basal bodies are almost at the same plane in the antero-posterior axis of the  
386 body (17). By contrast, in trypanosomes from the PV, the new flagellum is located in a  
387 posterior position in relation to the mature basal body. The distance between the basal  
388 bodies increases from 90 nm up to 700 nm and the new flagellum is then observed in the  
389 right side of the mature one, suggesting a rotational movement.

390           The difference in the sequence of events related to basal body segregation and  
391 rotation of the flagellum have implications on flagellar pocket morphogenesis. In procyclic  
392 trypanosomes, the rotational movement of the basal body facilitates flagellar pocket  
393 division (17). In PV trypanosomes, the later rotational movement is observed when the  
394 new flagellum has already emerged from its new flagellar pocket indicating that the  
395 separation of the flagellar pocket is probably not dependent of the rotational movement of  
396 the flagellum.

397           In all trypanosomes that exhibited two flagella observed by FIB-SEM, an electron-  
398 dense structure located at the tip of the new flagellum connecting the lateral aspects of both  
399 flagella was detected. TEM serial sections showed that this structure looks similar to the  
400 flagella connector described in procyclic trypanosomes (19,21,43). The flagella connector  
401 is a three-layered transmembrane junction that joins the tip of the new flagellum to the side  
402 of the mature one and is only present during the duplication cell cycle in procyclic  
403 trypanosomes. However, it is absent in bloodstream trypomastigotes (18,19,44). A flagella  
404 connector structure has previously been observed in trypanosomes from PV by TEM (10).  
405 However, the morphotype could not be determined because the nucleus and the kinetoplast  
406 were not in the plane of the section.

407           The flagella connector structure of PV trypanosomes is detected at the early stages  
408 of flagellum assembly and persists to the late transition forms. We hypothesize that the  
409 flagella connector could be involved in basal body segregation by anchoring the tip of the  
410 new flagellum to the mature one in early stages of flagellum elongation when it is inside  
411 the flagellar pocket. The flagella connector is facing the region of the basal plate and the  
412 proximal region of the axoneme of the mature flagellum and this location is maintained  
413 during elongation of the new flagellum until it emerges from the flagellar pocket, which  
414 coincides with basal body migration to the posterior region of the body. The stationary

415 position of the flagella connector could prevent further movement towards the anterior  
416 region hence elongation of the new flagellum could contribute in moving its basal body to  
417 a more posterior position. Such a potential function is consistent with the presence of the  
418 basal bodies at opposing poles of the kinetoplast. This is in contrast with procyclic cells  
419 where the flagella connector moves towards the mid portion of the old flagellum during  
420 elongation until it reaches a position at around 12  $\mu\text{m}$  from the base. At this stage, no  
421 further movement of the connector is observed but basal bodies migrate apart, being  
422 separated by 6  $\mu\text{m}$  instead of 2  $\mu\text{m}$  (45,46).

423         These results show the remarkable adaptation of processes driving flagellum  
424 assembly and cell morphology in trypanosomes using different tools such as cytoskeletal  
425 modifications, flagella connector positioning and flagellar pocket biogenesis to control and  
426 produce different morphologies suited for a specific parasite environment.

427

## 428 **Acknowledgements**

429         We thank Aline Crouzols and Christelle Travaillé for help with tsetse fly  
430 infection and dissection; Simon Corroyer Dulmont for the Amira training; Sue Vaughan  
431 (Oxford Brookes University, UK) and Derrick Robinson (Bordeaux University, France) for  
432 critical reading of the manuscript and Derrick Robinson and Frédéric Bringaud for  
433 providing the Mab25 and the anti-FTZC antibodies, respectively. We are grateful to the  
434 Ultrastructural Bioimaging facility for access to their equipment.

435         This work is funded by an ANR grant (ANR-18-CE13-0014), by La Fondation  
436 pour la Recherche Médicale (Equipe FRM DEQ20150734356) and by a French  
437 Government Investissement d’Avenir programme, Laboratoire d’Excellence “Integrative  
438 Biology of Emerging Infectious Diseases” (ANR-10-LABX-62-IBEID). We are also  
439 grateful for support for FESEM Zeiss Auriga equipment from the French Government

440 Programme Investissements d’Avenir France BioImaging (FBI, N° ANR-10-INSB-04-01)  
441 and from a DIM-Malinf grant from the Région Ile-de-France. E.B. was supported by  
442 fellowships from French National Ministry for Research and Technology (doctoral school  
443 CDV515) and from La Fondation pour la Recherche Médicale (FDT20170436836).  
444 The authors declare no competing financial interests.

445

446 Author contributions: M. Lemos infected and dissected the flies, performed the IFA assays  
447 and data analyses, prepared sample for FIB-SEM, acquired, segmented and measured the  
448 FIB-SEM data, and wrote the paper; A. Mallet acquired the FIB-SEM data, E. Bertiaux  
449 infected and dissected the flies; A. Imbert drew the cartoons; B. Rotureau corrected the  
450 manuscript; Philippe Bastin coordinated the project and corrected the manuscript. All  
451 authors commented on the manuscript.

452

453

454 **Figure legends**

455

456 Fig 1. Flagellum assembly is an early event during *T. brucei* differentiation in the  
457 PV. (A-E) Immunofluorescence assay using anti-FTZC (magenta) and mAb25 (green)  
458 antibodies as markers for TZ and Axoneme, respectively. DAPI was used for DNA  
459 staining (blue). (A, B) Trypomastigote cell with an oval nucleus, possessing either a single  
460 transition zone (TZ) and axoneme (A) or a second TZ (arrowhead) located laterally to the  
461 other one (B). (C, D) Trypomastigote cells with an elongated nucleus possessing either a  
462 single TZ and axoneme (C) or with a second axoneme (arrow) being assembled from the  
463 second TZ (arrowhead). (E) Late transition form, the kinetoplast is laterally disposed and  
464 located at the anterior half of the nucleus whereas the TZ of the new flagellum (arrowhead)  
465 is more distant from the TZ of the mature flagellum and the axoneme is being extended.  
466 Scale bar: 5µm. Axo, axoneme. Anterior and posterior regions of the cell are indicated on  
467 panel A.

468

469 Fig 2. The short new flagellum is inside the flagellar pocket at an early stage of  
470 elongation. Images were collected by FIB-SEM and segmented to generate the 3D model.  
471 The full stack is shown at video S1. (A) Slice view of a trypomastigote cell, the short new  
472 flagellum is laterally connected to the mature flagellum. (B) Top view of segmented  
473 kinetoplast (purple), new flagellum (orange) basal body (indicated by a white arrowhead),  
474 mature flagellum (red), and nucleus (blue). The new flagellum is located in a more  
475 posterior region in relation to the mature one. The diameter of the flagellum looks larger  
476 than that of the basal body because the membrane was used for segmentation. (C) Top  
477 view of the 3D model showing internal architecture of the cell including the position of the  
478 new basal body (white arrowhead) and the mature one (black arrowhead) and the entire

479 elongated nucleus. (D) The new flagellum is inside the flagellar pocket and it is not  
480 visualized at the cell surface. The cell body is in grey and the mature flagellum is in red.  
481 Scale bars: 2 $\mu$ m. NF, new flagellum; MF, mature flagellum; K, kinetoplast; N, nucleus.  
482 White and black arrowheads indicate the new and the mature basal bodies, respectively.  
483 Anterior and posterior regions of the cell are indicated on panel A.

484

485 Fig 3. The new flagellum emerges from its flagellar pocket during assembly. The  
486 full stack is shown at video S2. (A) Slice view of a trypomastigote cell with the basal body  
487 of the new flagellum (arrow), which is posterior in relation to the mature flagellum (MF).  
488 (B) Top view of the new flagellum emerging from its own flagellar pocket in a segmented  
489 cell. (C) Top view of internal organization of the segmented kinetoplast, new flagellum,  
490 mature flagellum and nucleus. The new flagellum is closely associated to the kinetoplast  
491 and is in a posterior position in relation with the mature flagellum. (D) Top view of the  
492 reconstructed cell body, the new flagellum is now observed at the cell surface. Scale bars:  
493 1 $\mu$ m. NF, new flagellum; MF, mature flagellum; K, kinetoplast; N, nucleus. White and  
494 black arrowheads indicate the new and the mature basal bodies, respectively. Anterior  
495 region and posterior regions of the cell are indicated on panel A.

496

497 Fig 4. Transition forms where the nucleus migrates towards the posterior region of  
498 the body. (A-D) Early transition form and (E-G) late transition form. (A, E) Slice view of  
499 trypanosomes exhibiting the nucleus, the kinetoplast, the new flagellum and the mature  
500 flagellum. (A) The parasite possesses a large kinetoplast and the new flagellum is not in  
501 the plane of the image. (B) Lateral view of the internal organization of a partially  
502 reconstructed trypanosome showing that nucleus migration reached the same plane as the  
503 kinetoplast. (C, F) 3D model of an early transition form (C) showing nucleus deformation

504 next to the mature flagellum and of a late transition form (F) where the deformation is seen  
505 in the region close to the kinetoplast. (D, G) Top view of partially reconstructed  
506 trypanosomes. (D) The new flagellum is located to the left side in relation to the mature  
507 flagellum. (G) The new flagellum is found at the left side of the posterior-anterior axis of  
508 the body. Scale bars: 1 $\mu$ m. NF, new flagellum; MF, mature flagellum; K, kinetoplast; N,  
509 nucleus. White and black arrowheads indicate the new and the mature basal bodies,  
510 respectively. Anterior region and posterior region of the cell are indicated on panel A and  
511 E.

512

513 Fig 5. Flagellum elongation in parasites during differentiation in the proventriculus.  
514 Measurements of the new flagellum (NF) were taken from the basal plate to the tip of the  
515 flagellar membrane in FIB-SEM stacks. Values are given in mean and the SE are  
516 indicated. The numbers of parasites is shown in parentheses.

517

518 Fig 6. The new flagellum is attached to the mature one via a flagella connector  
519 structure. (A) Low magnification of a trypomastigote cell in the PV. (B-D) TEM  
520 consecutive 80 nm-thick serial sections of the flagellar pocket region. (E) Image colorized  
521 highlighting different structures. (A) A trypomastigote cell with the kinetoplast in a  
522 posterior location in relation to the nucleus. (B) The new flagellum shares the flagellar  
523 pocket with the mature flagellum. (C, D) The short new flagellum is laterally attached to  
524 the mature one via a flagella connector structure (bordeaux arrowheads). The flagella  
525 connector is an electron-dense plate structure organized into three distinct layers laterally  
526 connecting the distal region of the new flagellum to the mature flagellum. (E) Basal bodies  
527 are colorized in dark grey, transition zones in magenta and axonemes in green. BB, TZ and  
528 Axo refers to the basal body, transition zone and axoneme, respectively. Number 1 refers

529 to the mature flagellum and number 2 to the new flagellum. Scale bars: 1  $\mu\text{m}$  (A) or 500nm  
530 (B-E).

531

532 Fig 7. Cartoon illustrating flagellum assembly in trypomastigote cells and in transition

533 forms from the PV. From left to right the first zoom with trypanosomes in dark grey

534 represents the surface view of the posterior region of the body, the emergence of the

535 flagellum from the flagellar pocket whilst the second zoom with trypanosomes in light

536 grey represents the internal view showing the full flagellum elongation process. The new

537 flagellum is represented in orange, the mature flagellum in red, the kinetoplast in purple

538 and the nucleus in blue. At the top, a trypomastigote containing a round nucleus illustrates

539 the stage that precedes the flagellum assembly. On top, the outside view shows a

540 trypanosome where only the mature flagellum is visible outside of the cell body. At stage

541 1, the internal view represents the 24% of 2F1K1N trypomastigote cells with an oval

542 nucleus and two signals for FTZC in IFA experiments. At stage 2, the short new flagellum

543 is located inside the flagellar pocket whilst only the mature one is visualized outside of the

544 cell body. The internal view represents the 2F1K1N configuration of trypomastigote cells

545 with an elongated nucleus, a new TZ and a new axoneme. The short new flagellum is

546 linked by its tip to the side of the mature one via the flagella connector as demonstrated by

547 serial TEM sectioning. At stage 3, the new flagellum is associated to the mature flagellum

548 via the flagella connector and elongates so that it is observed outside of the cell body. The

549 internal view shows that the nucleus is closer to the kinetoplast indicating the migration

550 towards the posterior region. Stage 4 are early transition form cells where the new

551 flagellum is elongating as demonstrated in the outside view. In the internal view, the

552 nucleus and the kinetoplast are at the same plane. Stage 5 correspond to the late transition

553 form. The outside view shows that the new flagellum has rotated in relation to the mature



554 one. The internal view shows nucleus migration is more advanced in a late transition form.

555 At the bottom, a short and a long epimastigote cell are represented, resulting from the

556 asymmetric division.

557

558

### 559 **Supplementary material**

560

561           Suppl Fig. 1. Graph showing the duplication of the TZ and the axoneme in the

562 trypomastigote population from the PV. Scale bar: 5 $\mu$ m. Axo, axoneme. Anterior and

563 posterior regions of the cell are indicated on panel A.

564

565           Video 1. 3D reconstruction of a long trypomastigote with a short new flagellum

566 located inside the flagellar pocket.

567           Video 2. The new flagellum has emerged from its own flagellar pocket and is

568 visible outside of the cell body.

569

570

571

## 572 References

573

- 574 1. Vickerman K. Developmental cycles and biology of pathogenic trypanosomes. Br Med  
575 Bull. 1985; 41(2):105–114. <https://doi.org/10.1093/oxfordjournals.bmb.a072036>.
- 576 2. Vickerman K. Developmental cycles and biology of pathogenic trypanosomes. Br Med  
577 Bull. 1985; 41(2):105–114. <https://doi.org/10.1093/oxfordjournals.bmb.a072036>.
- 578 3. Van Den Abbeele J, Claes Y, Van Bockstaele D, Le Ray D, Coosemans M.  
579 *Trypanosoma brucei* spp. development in the tsetse fly: Characterization of the post-  
580 mesocyclic stages in the foregut and proboscis. Parasitology. 1999;118(5): 469–478.
- 581 4. Rotureau B, Subota I, Bastin P. Molecular bases of cytoskeleton plasticity during the  
582 *Trypanosoma brucei* parasite cycle. Cell Microbiol. 2011;13(5): 705–716. doi:  
583 10.1111/j.1462-5822.2010.01566.x.
- 584 5. Rotureau B, Subota I, Buisson J, Bastin P. A new asymmetric division contributes to the  
585 continuous production of infective trypanosomes in the tsetse fly. Development.  
586 2012;139(10): 1842–50. doi: 10.1242/dev.072611.
- 587 6. Rotureau B, Van Den Abbeele J. Through the dark continent: African trypanosome  
588 development in the tsetse fly. Front Cell Infect Microbiol. 2013;53. doi:  
589 10.3389/fcimb.2013.00053.
- 590 7. Oberle M, Balmer O, Brun R, Roditi I. Bottlenecks and the maintenance of minor  
591 genotypes during the life cycle of *Trypanosoma brucei*. PLoS Pathog. 2010;6(7):1–8.  
592 doi: 10.1371/journal.ppat.1001023.
- 593 8. Tetley L. Differentiation in *Trypanosoma brucei*: host-parasite cell junctions and  
594 their persistence during acquisition of the variable antigen coat. J Cell Sci. 1985;74: 1–  
595 19.
- 596 9. Vickerman K. The mechanism of cyclical development in trypanosomes of the  
597 *Trypanosoma brucei* sub-group: An hypothesis based on ultrastructural observations.  
598 Trans R Soc Trop Med Hyg. 1962; 56:487–488. [https://doi.org/10.1016/0035-](https://doi.org/10.1016/0035-9203(62)90072-X)  
599 9203(62)90072-X.
- 600 10. Sharma R, Peacock L, Gull K, Gluenz E, Gibson W, Carrington M. Asymmetric Cell  
601 Division as a Route to Reduction in Cell Length and Change in Cell Morphology in  
602 Trypanosomes. Protist. 2008;159(1): 137–151. doi:10.1016/j.protis.2007.07.004.
- 603 11. Ooi C-P, Bastin P. More than meets the eye: understanding *Trypanosoma brucei*  
604 morphology in the tsetse. Front Cell Infect Microbiol. 2013;3:1–12. doi:  
605 10.3389/fcimb.2013.00071.
- 606 12. Robinson DR, Gull K. Basal body movements as a mechanism for mitochondrial  
607 genome segregation in the trypanosome cell cycle. Nature 1991; 352 (6337): 731–733.  
608 doi: 10.1038/352731a0.
- 609 13. Ogbadoyi, E.O.; Robinson, D.; Gull K. A High-Order Trans-Membrane Structural  
610 Linkage Is Responsible for Mitochondrial Genome Positioning and Segregation by  
611 Flagellar Basal Bodies in Trypanosomes. Mol Biol Cell. 2003;13: 3192– 3202. doi:  
612 10.1091/mbc.e02-08-0525.
- 613 14. Hoare CA, Wallace FG. Developmental Stages of Trypanosomatid Flagellates: a New  
614 Terminology. Nature. 1966; 212 (5068): 1385–1386. doi:10.1038/2121385a0.
- 615 15. Sherwin T, Gull K. The cell division cycle of *Trypanosoma brucei brucei*: timing of  
616 event markers and cytoskeletal modulations. Philos Trans R Soc Lond B Biol Sci. 1989;  
617 323 (1218): 573–588. doi: 10.1098/rstb.1989.0037.
- 618 16. Lacomble S, Vaughan S, Gadelha C, Morphey MK, Shaw MK, McIntosh JR, et al.  
619 Three-dimensional cellular architecture of the flagellar pocket and associated  
620 cytoskeleton in trypanosomes revealed by electron microscope tomography. J Cell Sci.  
621 2009;122 (8): 1081–1090. doi: 10.1242/jcs.045740.

- 622 17. Lacomble S, Vaughan S, Gadelha C, Morphew MK, Shaw MK, McIntosh JR, et al.  
623 Basal body movements orchestrate membrane organelle division and cell  
624 morphogenesis in *Trypanosoma brucei*. *J Cell Sci*. 2010; 123(17): 2884–2891. doi:  
625 10.1242/jcs.074161.
- 626 18. Moreira-Leite FF, Sherwin T, Kohl L, Gull K. A trypanosome structure involved in  
627 transmitting cytoplasmic information during cell division. *Science*. 2001; 294(5542):  
628 610–612. doi: 10.1126/science.1063775.
- 629 19. Briggs LJ, McKean PG, Baines A, Moreira-Leite F, Davidge J, Vaughan S, et al. The  
630 flagella connector of *Trypanosoma brucei*: an unusual mobile transmembrane junction.  
631 *J Cell Sci*. 2004;117(9): 1641–1651. doi: [10.1242/jcs.00995](https://doi.org/10.1242/jcs.00995)
- 632 20. Vaughan S, Gull K. The structural mechanics of cell division in *Trypanosoma brucei*.  
633 *Biochem Soc Trans*. 2008; 36(3): 421–424. doi: 10.1042/BST0360421.
- 634 21. Höög JL, Lacomble S, Bouchet-Marquis C, Briggs L, Park K, Hoenger A, et al. 3D  
635 Architecture of the *Trypanosoma brucei* Flagella Connector, a Mobile Transmembrane  
636 Junction. *PLoS Negl Trop Dis*. 2016; 10(1):e0004312. doi:  
637 10.1371/journal.pntd.0004312.
- 638 22. Rotureau B, Ooi CP, Huet D, Perrot S, Bastin P. Forward motility is essential for  
639 trypanosome infection in the tsetse fly. *Cell Microbiol*. 2014;16(3):425–33. doi:  
640 10.1111/cmi.12230.
- 641 23. Schuster S, Krüger T, Subota I, Thusek S, Rotureau B, Beilhack A, et al.  
642 Developmental adaptations of trypanosome motility to the tsetse fly host environments  
643 unravel a multifaceted in vivo microswimmer system. *Elife*. 2017; 6:1–28. doi:  
644 10.7554/eLife.27656.
- 645 24. Kohl L, Robinson D, Bastin P. Novel roles for the flagellum in cell morphogenesis and  
646 cytokinesis of trypanosomes. *EMBO J*. 2003; 22(20): 5336–5346. doi:  
647 10.1093/emboj/cdg518.
- 648 25. Zhou Q, Liu B, Sun Y, He CY. A coiled-coil- and C2-domain-containing protein is  
649 required for FAZ assembly and cell morphology in *Trypanosoma brucei*. *J Cell Sci*.  
650 2011; 124(22): 3848–3858. doi: 10.1242/jcs.087676.
- 651 26. Rotureau B, Morales MA, Bastin P, Späth GF. The flagellum-mitogen-activated  
652 protein kinase connection in Trypanosomatids: A key sensory role in parasite signalling  
653 and development? *Cell Microbiol*. 2009;11(5):710–718. doi: 10.1111/j.1462-  
654 5822.2009.01295.x.
- 655 27. Oberholzer M, Lopez MA, McLelland BT, Hill KL. Social motility in African  
656 trypanosomes. *PLoS Pathog*. 2010; 6(1): e1000739. doi: 10.1371/journal.ppat.1000739.
- 657 28. Sharma R, Gluenz E, Peacock L, Gibson W, Gull K, Carrington M. The heart of  
658 darkness: growth and form of *Trypanosoma brucei* in the tsetse fly. *Trends in Parasito*.  
659 2009; (25(11)): 517–524. doi: 10.1016/j.pt.2009.08.001.
- 660 29. Lehane MJ. Peritrophic matrix structure and function. *Annu Rev Entomol*. 1997;  
661 42:525–550. doi: 10.1146/annurev.ento.42.1.525.
- 662 30. Hegedus D, Erlandson M, Gillott C, Toprak U. New Insights into Peritrophic Matrix  
663 Synthesis, Architecture, and Function. *Annu Rev Entomol*. 2009; 54(1):285–302. doi:  
664 10.1146/annurev.ento.54.110807.090559.
- 665 31. Le Ray D, Barry J, Easton C, Vickerman K. first tsetse fly transmission of the AnTat  
666 serodeme of *trypanosoma brucei*. *Ann Soc Belge Méd Trop*. 1977; 57(4–5):369–381.
- 667 32. Calvo-Alvarez E, Cren-Travaillé C, Crouzols A, Rotureau B. A new chimeric triple  
668 reporter fusion protein as a tool for in vitro and in vivo multimodal imaging to monitor  
669 the development of African trypanosomes and Leishmania parasites. *Infect Genet Evol*.  
670 2018;63:391–403. doi: 10.1016/j.meegid.2018.01.011.
- 671 33. Brun R, Schönenberger. Cultivation and in vitro cloning or procyclic culture forms of

- 672 *Trypanosoma brucei* in a semi-defined medium. Short communication. Acta Trop.  
673 1979; 36(3): 289-292.
- 674 34. Bringaud F, Robinson DR, Barradeau S, Biteau N, Baltz D, Baltz T. Characterization  
675 and disruption of a new *Trypanosoma brucei* repetitive flagellum protein, using double-  
676 stranded RNA inhibition. Mol Biochem Parasitol. 2000; 111(2): 283–297.
- 677 35. Pradel LC, Bonhivers M, Landrein N, Robinson DR. NIMA-related kinase TbNRKC is  
678 involved in basal body separation in *Trypanosoma brucei*. J Cell Sci. 2006;119(9):  
679 1852–1863. doi: 10.1242/jcs.02900.
- 680 36. Dacheux D, Landrein N, Thonnus M, Gilbert G, Sahin A, Wodrich H, et al. A MAP6-  
681 Related protein is present in protozoa and is involved in flagellum motility. PLoS One.  
682 2012;7(2): e31344. doi: 10.1371/journal.pone.0031344.
- 683 37. Luft JH. Improvements in Epoxy resin embedding methods. J Cell Biol. 1961; 9(2):  
684 409–414. doi: 10.1083/jcb.9.2.409.
- 685 38. Schneider CA, Rasband WS, Eliceiri KW. NIH Image to ImageJ: 25 years of image  
686 analysis. Nat Methods. 2012; 9(7): 671-675.
- 687 39. Matthews KR, Gull K. Cycles within cycles: The interplay between differentiation  
688 and cell division in *Trypanosoma brucei*. Parasitol Today. 1994;10(12): 473–476.
- 689 40. Tyler KM, Matthews KR, Gull K. Anisomorphic cell division by African  
690 trypanosomes. Protist. 2001;152(4): 367–378. doi: [10.1078/1434-4610-00074](https://doi.org/10.1078/1434-4610-00074).
- 691 41. Rico E, Rojas F, Mony BM, Szoor B, MacGregor P, Matthews KR. Bloodstream form  
692 pre-adaptation to the tsetse fly in *Trypanosoma brucei*. Front Cell Infect Microbio.  
693 2013; 3: 1–15. doi: 10.3389/fcimb.2013.00078.
- 694 42. Vaughan S, Gull K. Basal body structure and cell cycle-dependent biogenesis in  
695 *Trypanosoma brucei*. Cilia. 2016; 5(1): 1–7. doi: 10.1186/s13630-016-0023-7.
- 696 43. Trépout S, Tassin AM, Marco S, Bastin P. STEM tomography analysis of the  
697 trypanosome transition zone. J Struct Biol. 2018; 202(1): 51-60. doi:  
698 10.1016/j.jsb.2017.12.005.
- 699 44. Hughes L, Towers K, Starborg T, Gull K, Vaughan S. A cell-body groove housing the  
700 new flagellum tip suggests an adaptation of cellular morphogenesis for parasitism in the  
701 bloodstream form of *Trypanosoma brucei*. J Cell Sci. 2013;126(24): 5748–5757. doi:  
702 10.1242/jcs.139139.
- 703 45. Absalon S, Kohl L, Branche C, Blisnick T, Toutirais G, Rusconi F, et al. Basal body  
704 positioning is controlled by flagellum formation in *Trypanosoma brucei*. PLoS One.  
705 2007;2(5): e437. doi: 10.1371/journal.pone.0000437.
- 706 46. Davidge JA, Chambers E, Dickinson HA, Towers K, Ginger ML, McKean PG, et al.  
707 Trypanosome IFT mutants provide insight into the motor location for mobility of the  
708 flagella connector and flagellar membrane formation. J Cell Sci. 2006;119(19): 3935–  
709 3943. doi: 10.1242/jcs.03203.

710  
711  
712  
713  
714  
715

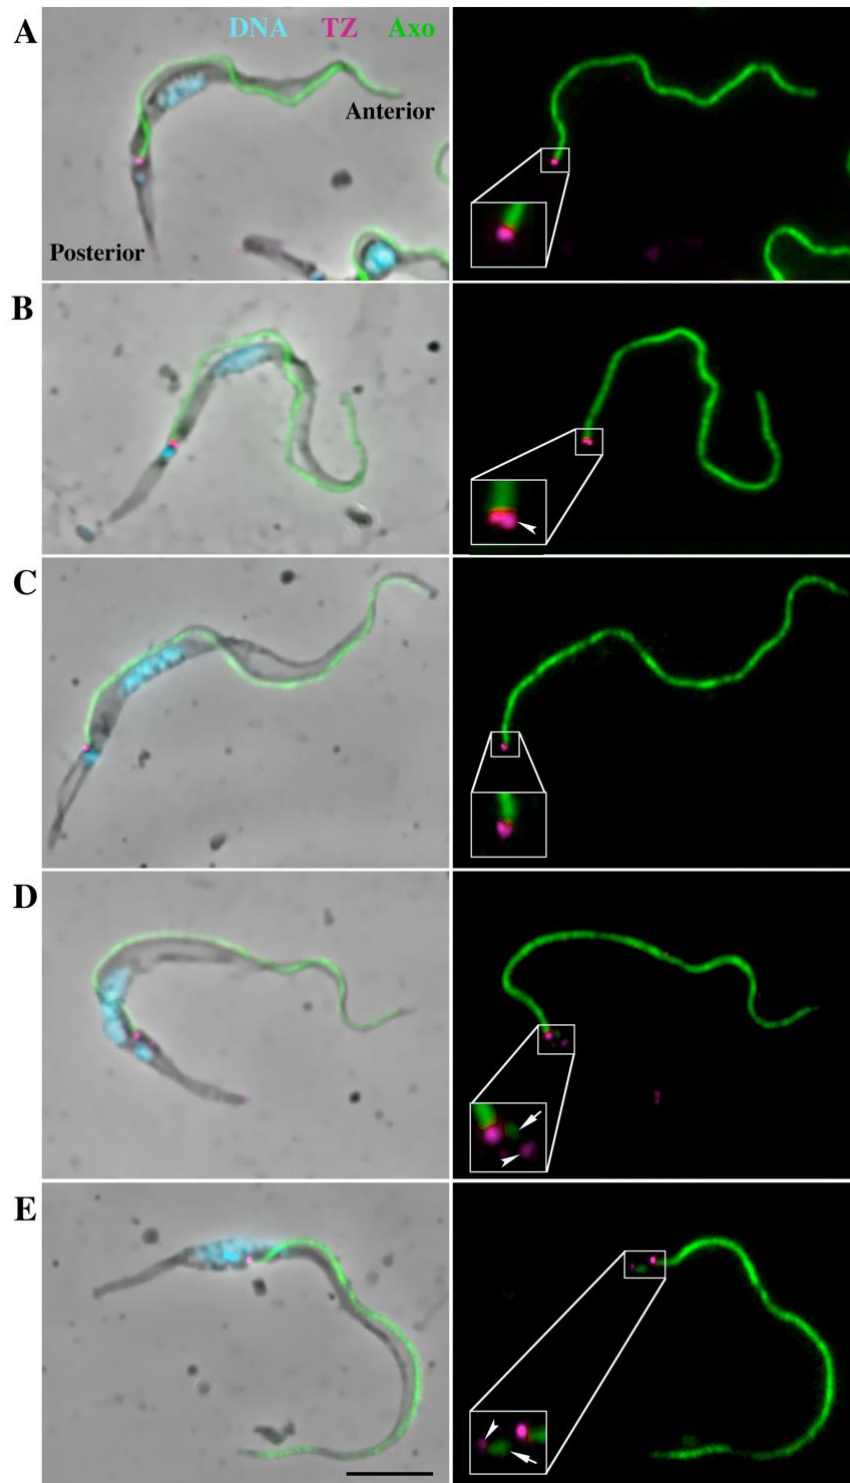

716  
717 Fig. 1  
718  
719

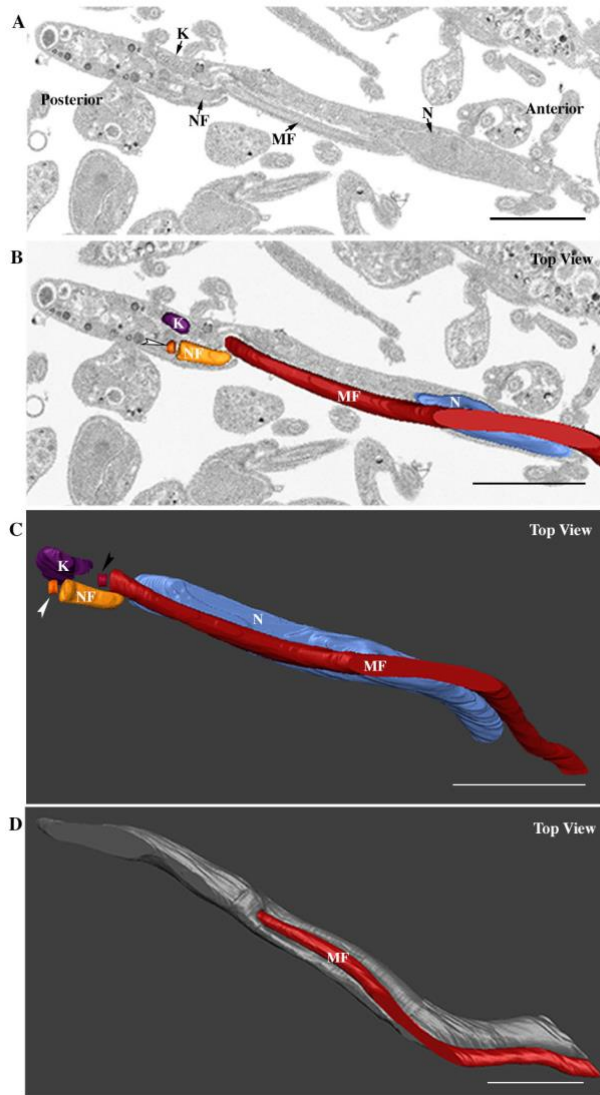

720  
721 Fig. 2

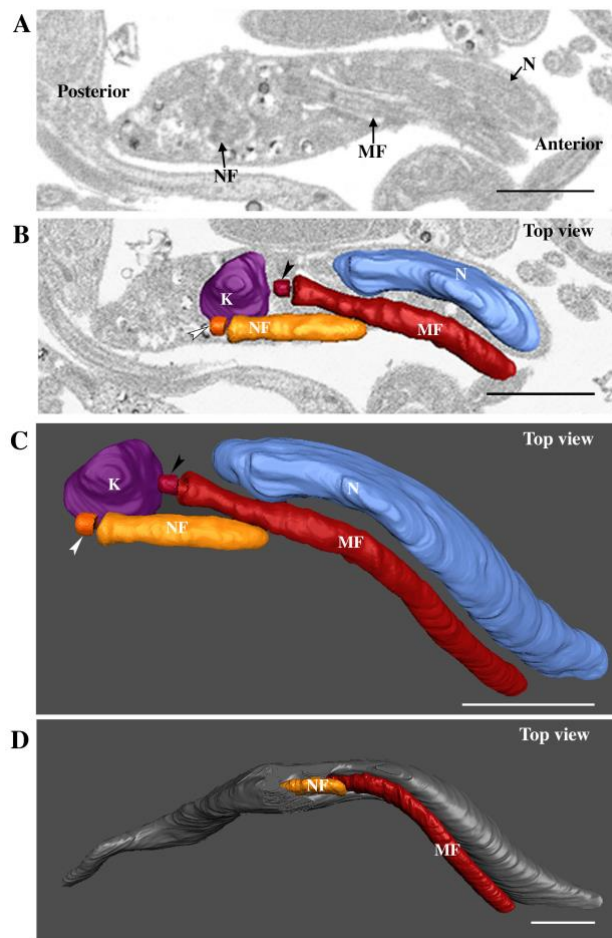

722  
723 Fig. 3

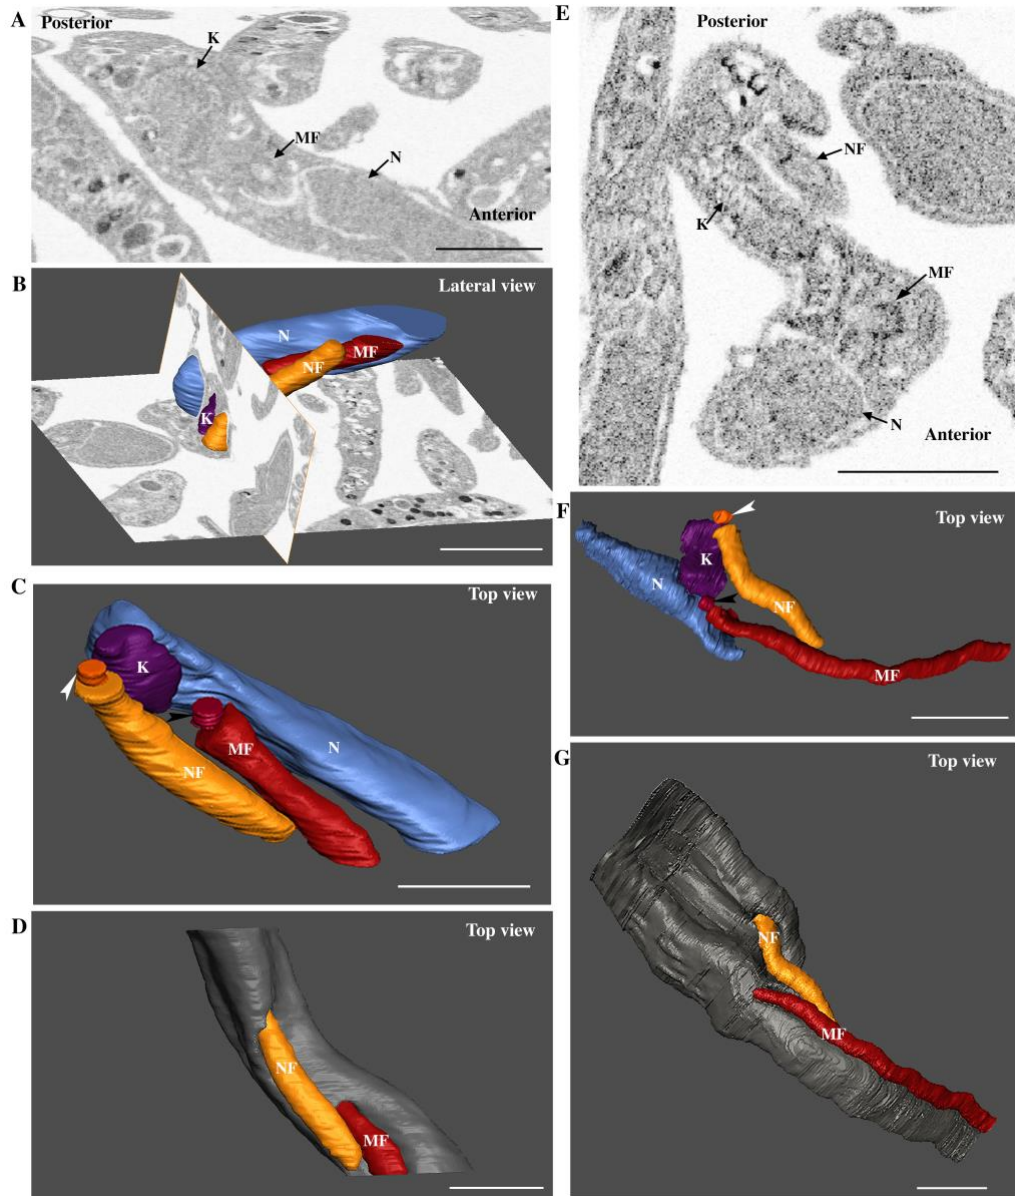

724  
725 Fig. 4  
726  
727  
728



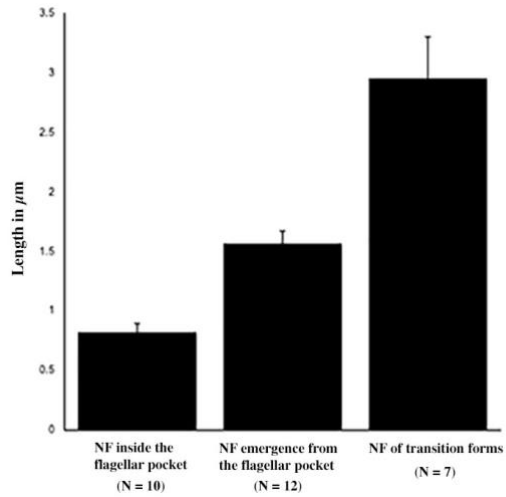

729  
730 Fig. 5  
731  
732

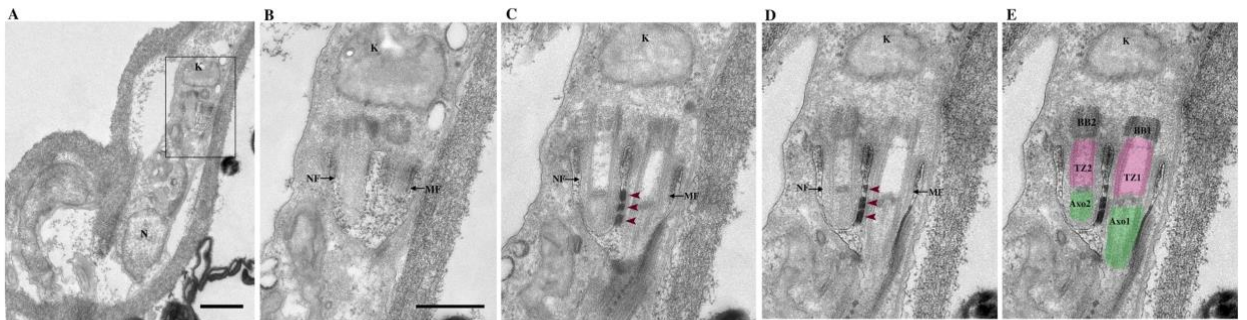

733  
734 Fig. 6  
735

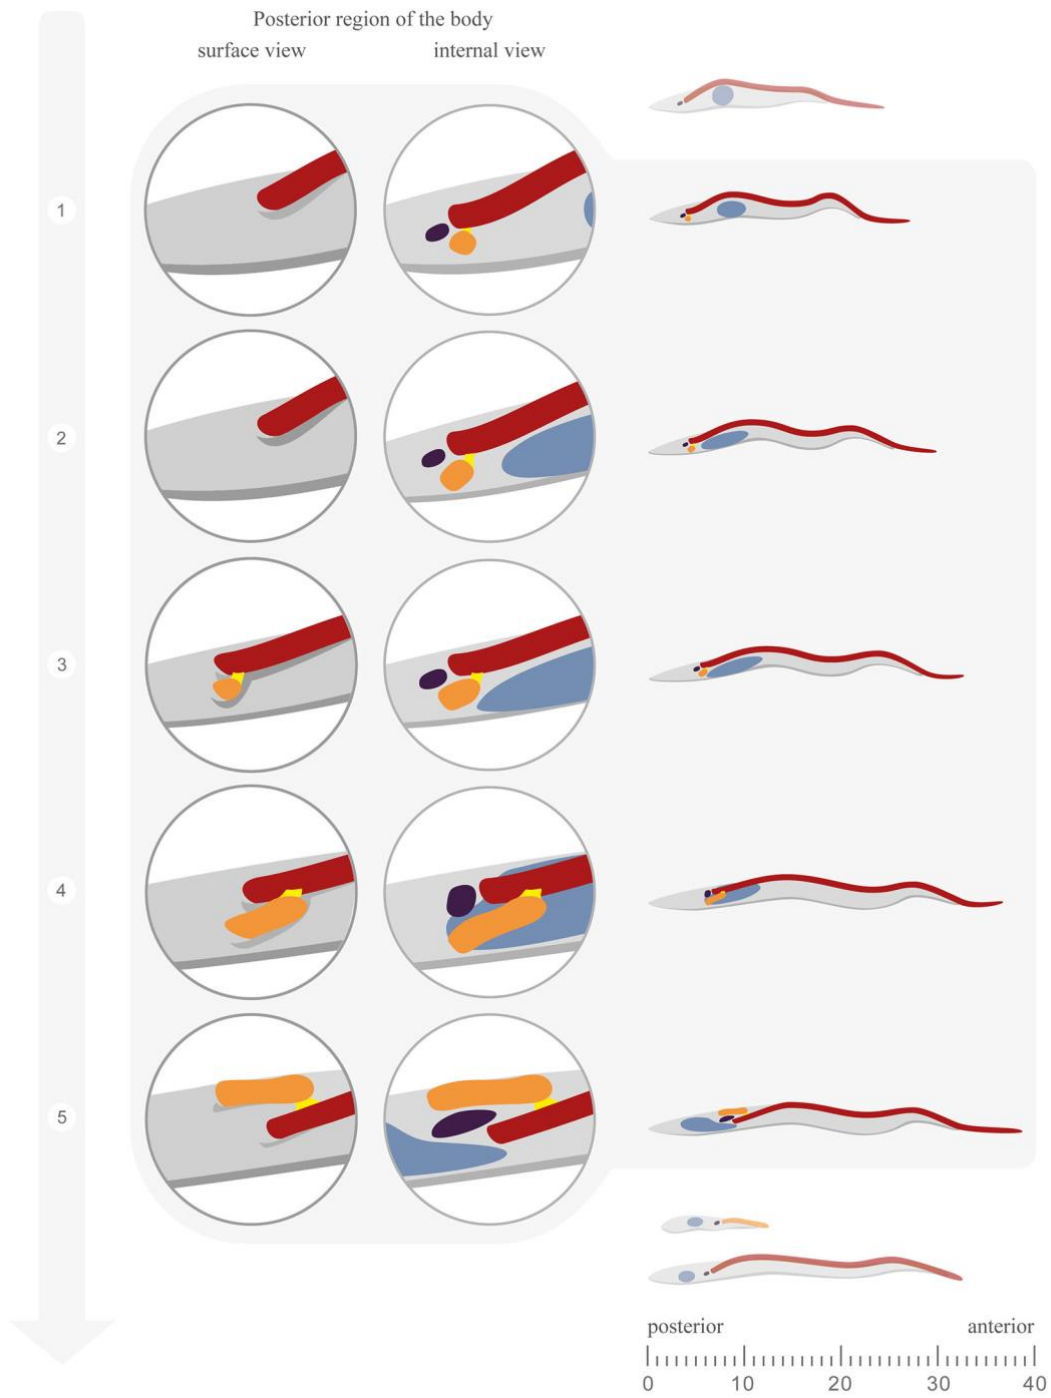

736  
737 Fig. 7  
738

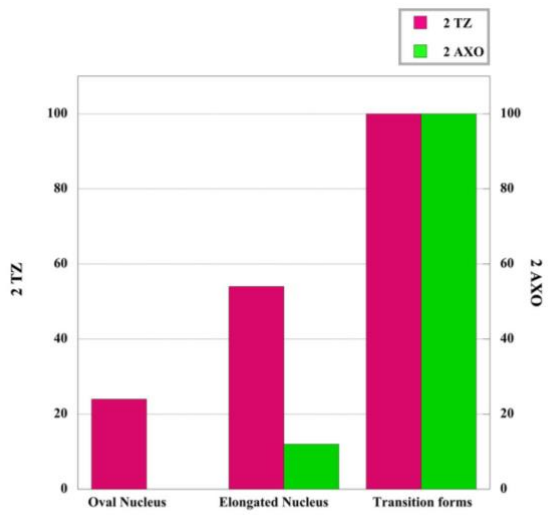

739

740

741 Suppl Fig. 1.
